# Supplementary material for: Emulating synaptic behavior in surface-functionalized MoS2through modulation of interfacial charge transferviaexternal stimuli
Source: Royal Society of Chemistry journal article supplement (doi:10.1039/d2cp03353d), 2022-01-01
Supplement: d2cp03353d1.pdf [file d2cp03353d1.pdf]

**Supporting Information for:**

**Emulating Synaptic Behavior in Surface-Functionalized MoS<sub>2</sub> through Modulation of Interfacial Charge Transfer via External Stimuli**

Fernando A. Soto<sup>a1</sup>, Perla B. Balbuena<sup>a,b,c,\*</sup>, Sarbajit Banerjee<sup>b,c</sup>, Lei Fang<sup>b,c</sup>

<sup>a</sup> Department of Chemical Engineering, Texas A&M University, College Station, Texas 77843, United States

<sup>b</sup> Department of Materials Science Engineering, Texas A&M University, College Station, Texas 77843, United States

<sup>c</sup> Department of Chemistry, Texas A&M University, College Station, Texas 77843, United States

\*e-mail: [balbuena@tamu.edu](mailto:balbuena@tamu.edu)

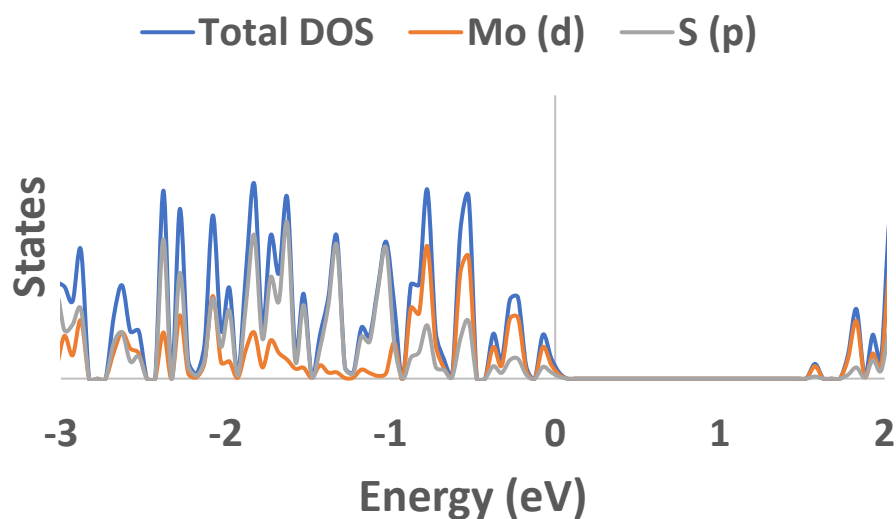

**Figure S1.** GGA-PBE calculated density of states (DOS) profile for the pristine basal plane of MoS<sub>2</sub>.

---

<sup>1</sup>Penn State Greater Allegheny, Pennsylvania State University, McKeesport, PA 15132, USA

<sup>1</sup>Penn State Greater Allegheny, Pennsylvania State University, McKeesport, PA 15132, USA

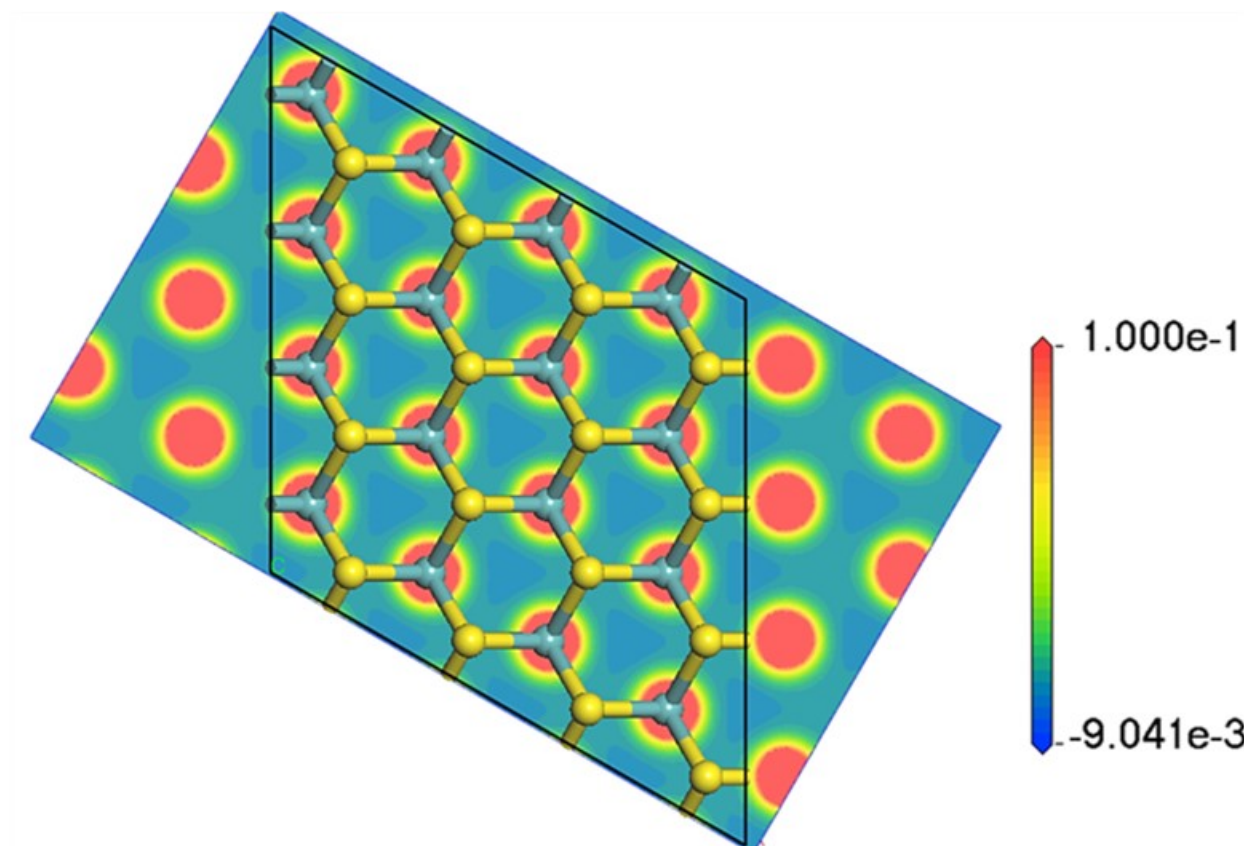

**Figure S2.** Electron density map for MoS<sub>2</sub>'s basal plane, parallel to the [001] direction and across Mo atoms. Color code: Yellow and green spheres represent S and Mo atoms.

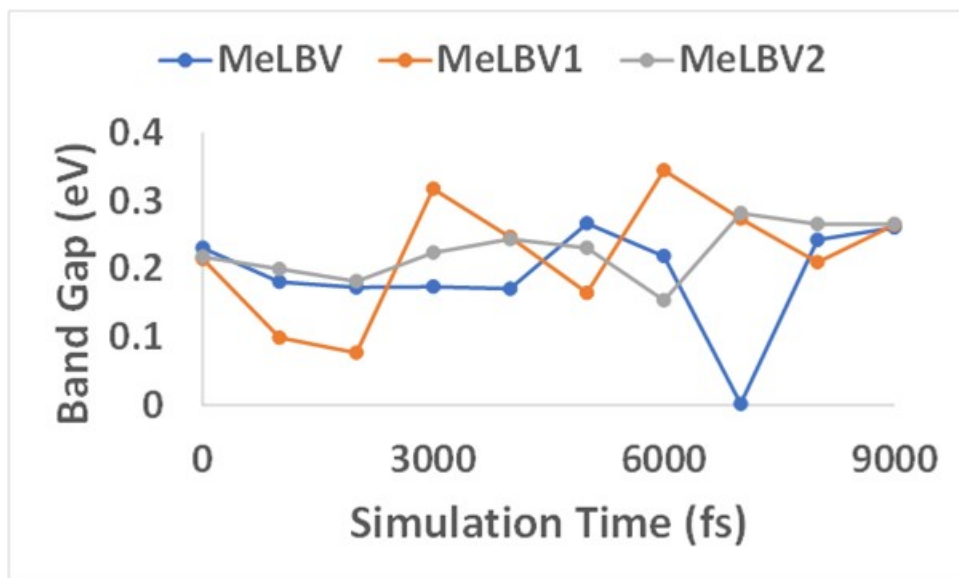

**Figure S3.** DFT/PBE calculated band gap evolution of the three MoS<sub>2</sub>|RMVX systems shown in Fig. 1.

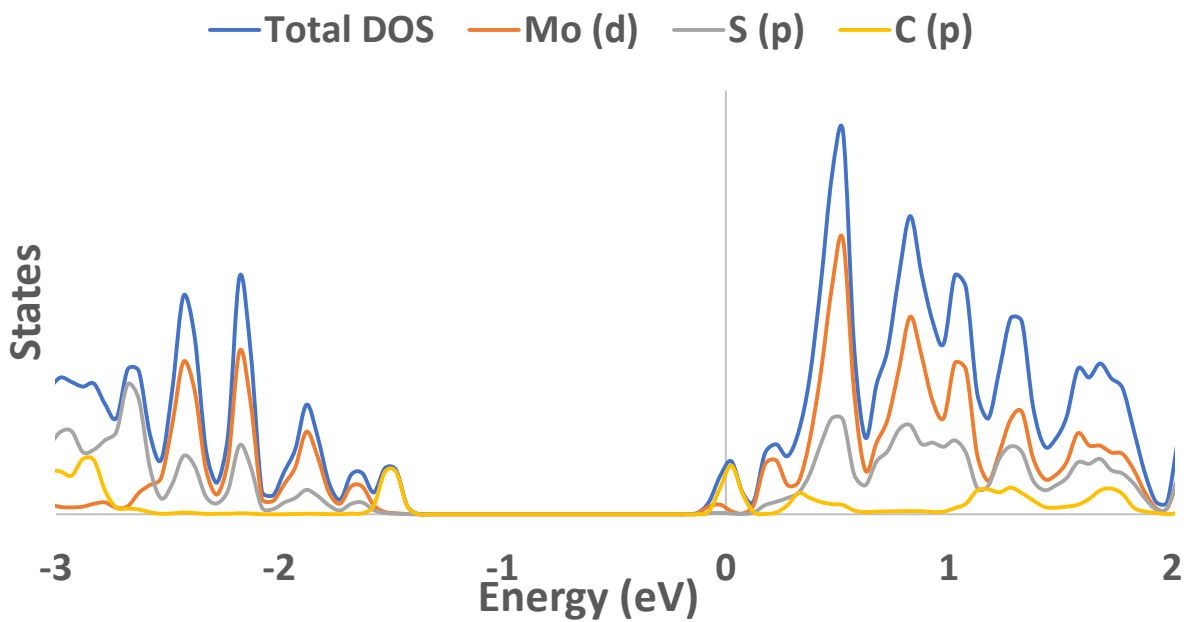

**Figure S4.** GGA-PBE calculated DOS profile for the MoS<sub>2</sub>|RMV3 system.

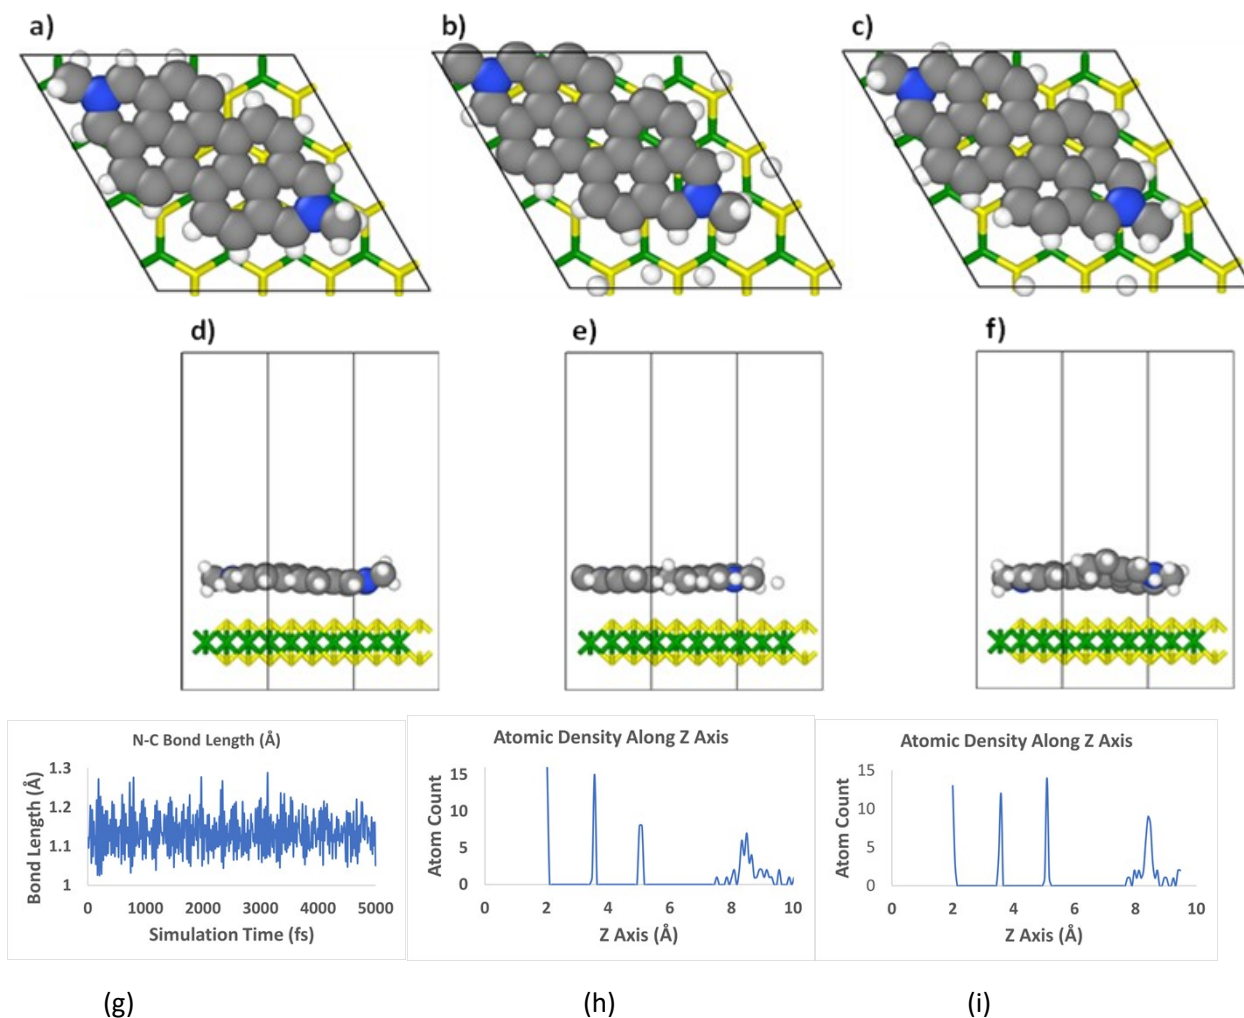

**Figure S5.** Panels a), b) and c) show top view images of the MoS<sub>2</sub>|RMV3 heterostructure at the initial structure, 4500 fs and 9000 fs, respectively. Panels d), e) and f) show top view images of the MoS<sub>2</sub>|RMV3 heterostructure at the initial structure, 4500 fs and 9000 fs, respectively. Color code: green, yellow, gray, blue and white spheres represent Mo, S, C, N and H atoms, respectively. Panels (g), (h), and (i) display the time evolution changes of the NC bond length of the RMV3 molecule, the average atomic density for the MoS<sub>2</sub>/ RMV3 system along the Z axis at -0.3 V/Å, and at zero electric field respectively. The last peak between 8 and 10 Å in (h) reveal variations in the molecular density under the applied field.

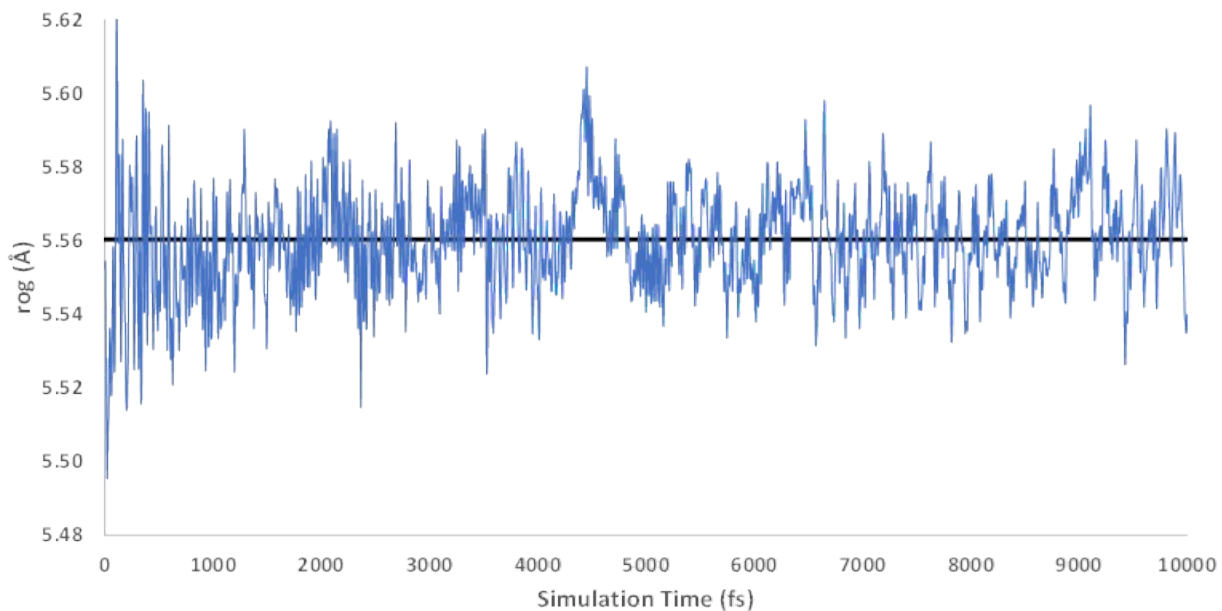

**Figure S6.** RoG evolution at 300 K of the MoS<sub>2</sub>|RMV3 heterostructure.

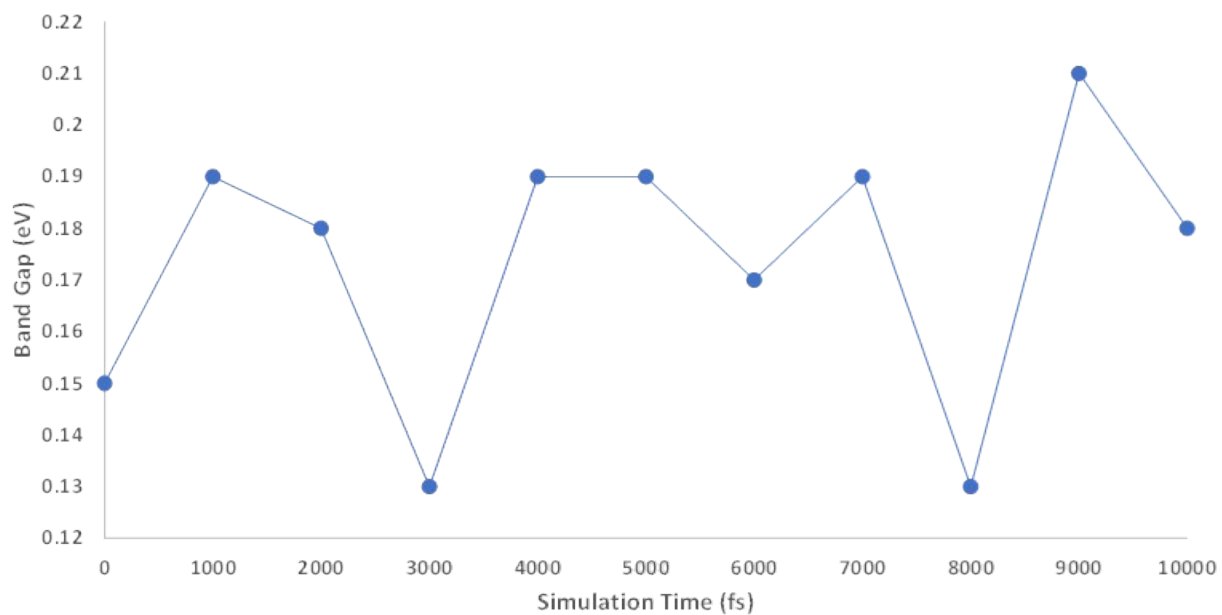

**Figure S7.** Band gap evolution at 300 K of the MoS<sub>2</sub>| RMV3 heterostructure.

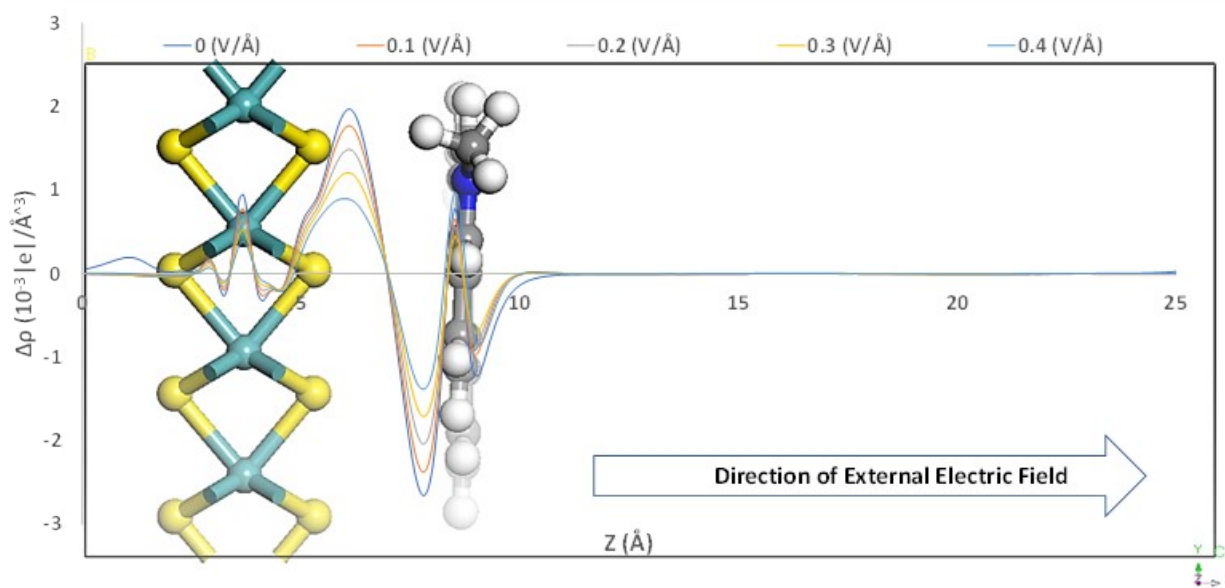

**Figure S8.** Plane-averaged charge density differences along the z direction for  $\text{MoS}_2|\text{RMV3}$  heterostructure. Color code: Yellow, green, gray, blue and white spheres represent S, Mo, C, N and H atoms, respectively.

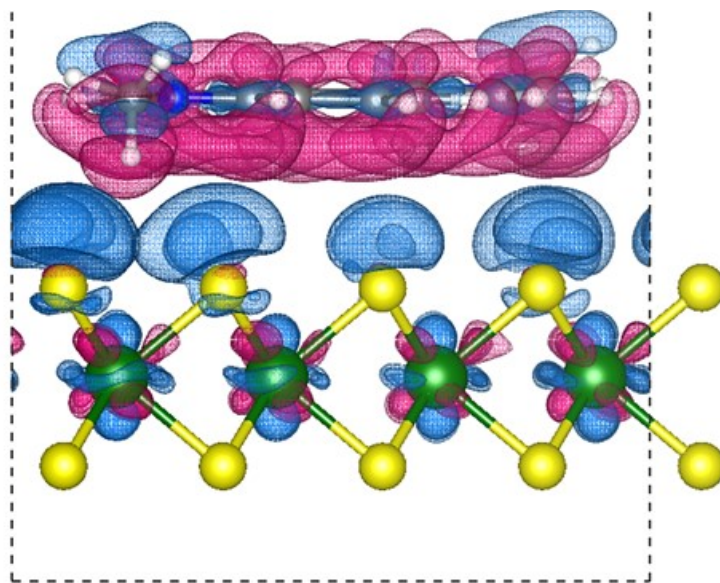

**Figure S9.** Charge density difference isosurface at  $0.0005 \text{ e}/\text{\AA}^3$  for the  $\text{MoS}_2|\text{RMV3}$  heterostructure optimized at an electric field strength of  $0.3 \text{ V/\AA}$  pointing inwards towards the basal plane. Color code: Yellow, green, gray, blue and white spheres represent S, Mo, C, N and H atoms, respectively.

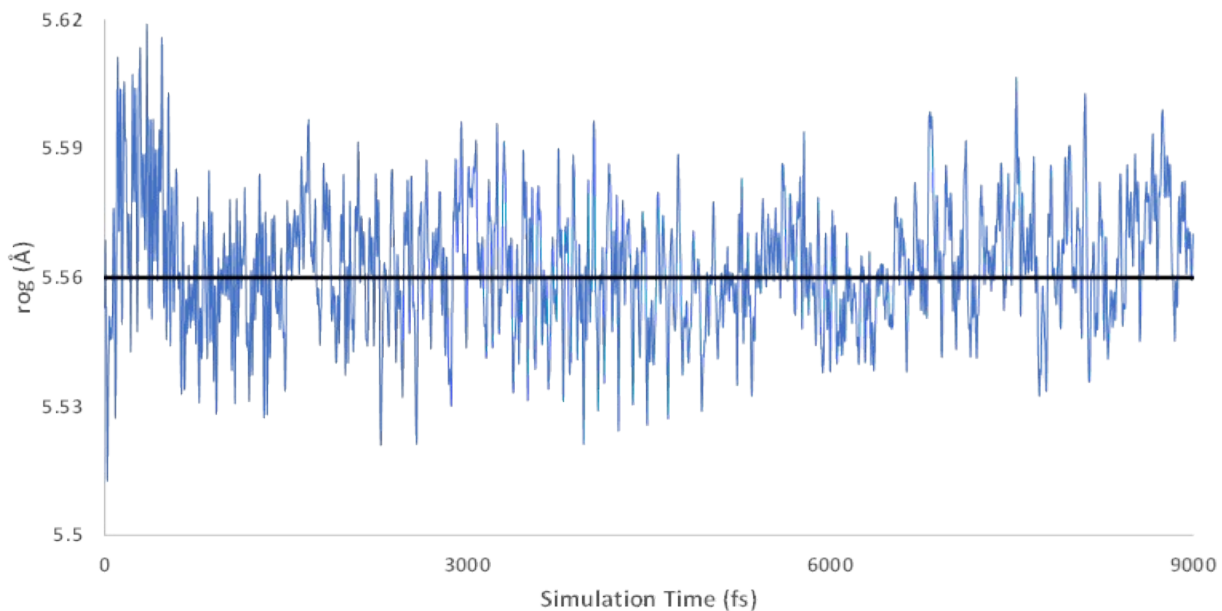

**Figure S10.** The rog evolution at 300 K of the MoS<sub>2</sub>|RMV3 heterostructure with an external stimulus of -0.3 V/Å.

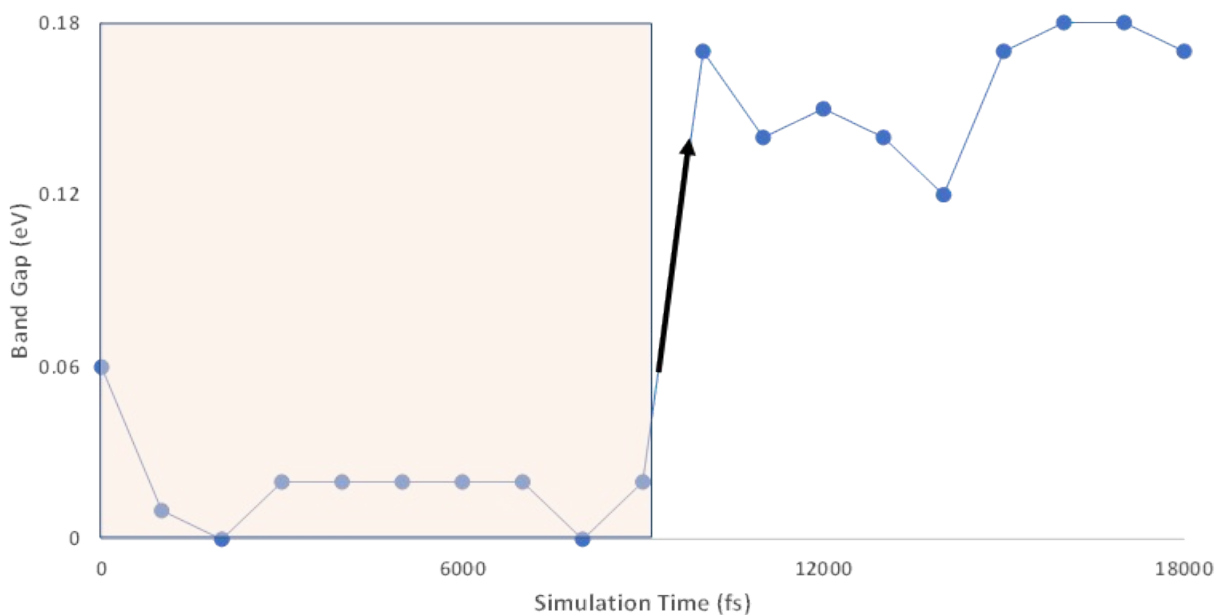

**Figure S11.** Bandgap evolution at 300 K of the MoS<sub>2</sub>| RMV3 heterostructure with applied field (-0.3 V/Å) from 0 to 9000 fs and with the field switched off from 9000 fs to 18000 fs.

Table S1. Rog values and band gap of the optimized MoS<sub>2</sub>|RMV3 system with the applied electric field values of -0.5 V/Å and 0.5 V/Å.

| Electric Field | Radius of Gyration | Band Gap (eV) |
|----------------|--------------------|---------------|
| -0.5 V/Å       | 4.10               | 0.05          |
| 0.5 V/Å        | 4.11               | 0.24          |
